# Supplementary material for: Ten‐year outcomes in a randomized phase II study of kidney transplant recipients administered belatacept 4‐weekly or 8‐weekly
Source: PubMed Central journal article supplement — Am J Transplant. 2017 Sep 5;17(12):3219–27. doi: 10.1111/ajt.14452 (PMC5724691; doi:10.1111/ajt.14452), 2017-09-05
Supplement: AJT-17-3219-s001.pdf [file AJT-17-3219-s001.pdf]

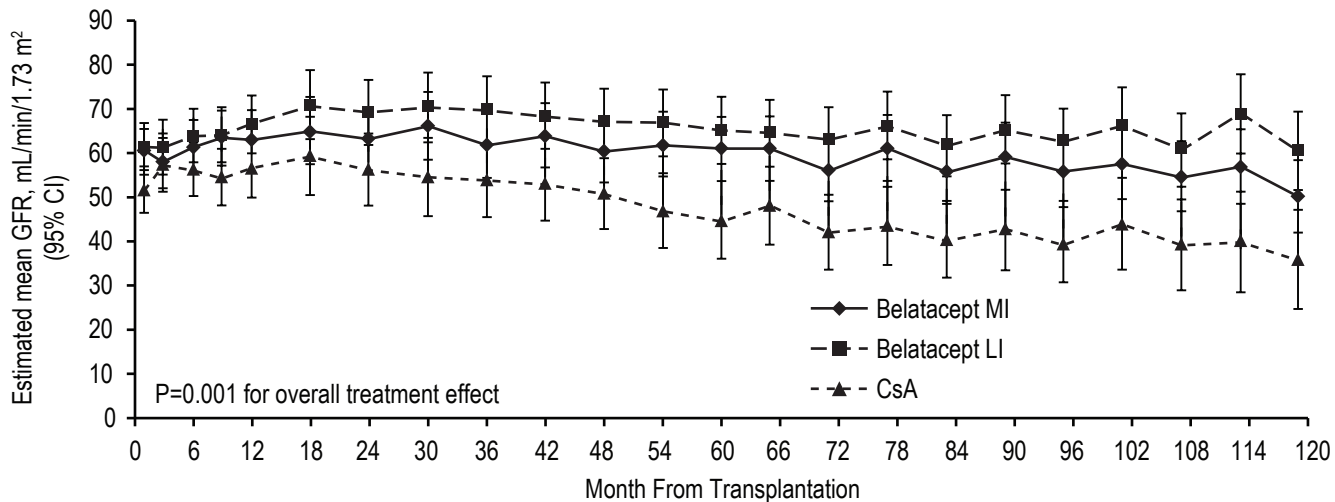

|                  | Belatacept MI |                    | Belatacept LI |                    | CsA            |
|------------------|---------------|--------------------|---------------|--------------------|----------------|
|                  | GFR           | Difference vs. CsA | GFR           | Difference vs. CsA | GFR            |
| Year 1           | 63.1          | 6.4                | 66.6          | 9.9                | 56.7           |
| Year 3           | 62.0          | 7.9                | 69.9          | 15.9               | 54.1           |
| Year 5           | 61.2          | 16.3               | 65.2          | 20.3               | 44.9           |
| Year 7           | 55.9          | 15.6               | 61.8          | 21.4               | 40.3           |
| Year 10          | 50.3          | 14.2               | 60.6          | 24.5               | 36.1           |
| <b>Slope</b>     |               |                    |               |                    |                |
| Point Estimate   | -0.73         |                    | -0.04         |                    | -1.67          |
| 95% CI           | -1.47 to 0.02 |                    | -0.82 to 0.75 |                    | -2.68 to -0.67 |
| P-values vs. CsA | 0.14          |                    | 0.0117        |                    | —              |
